# Supplementary material
Source: PubMed Central journal article supplement (PMC2930728)
Supplement: supp_M110.131003_jbc.M110.131003-1.pdf [file supp_M110.131003_jbc.M110.131003-1.pdf]

## **Supplementary Information**

### **Postendocytic sorting of Constitutively Internalized Dopamine Transporter in Cell Lines and Dopaminergic Neurons**

Jacob Eriksen<sup>1</sup>, Walden Emil Bjørn-Yoshimoto<sup>1</sup>, Trine Nygaard Jørgensen<sup>1</sup>, Amy Hauck Newman<sup>2</sup>  
and Ulrik Gether<sup>1</sup>

<sup>1</sup>Molecular Neuropharmacology Group and Center for Pharmacogenomics, Department of Neuroscience and Pharmacology, Faculty of Health Sciences, the Panum Institute, University of Copenhagen, DK-2200 Copenhagen, Denmark, and <sup>2</sup>Medicinal Chemistry Section, National Institute on Drug Abuse–Intramural Research Program, National Institutes of Health, Baltimore, Maryland 21224

**Running title:** Sorting of internalized dopamine transporter

**Corresponding author:**

Ulrik Gether, Molecular Neuropharmacology Group  
Department of Neuroscience and Pharmacology  
University of Copenhagen  
The Panum Institute 18.6, Blegdamsvej 3, DK-2200 Copenhagen N, Denmark  
Tel: +45 35327548  
Fax: +45 35327610  
E-mail: [gether@sund.ku.dk](mailto:gether@sund.ku.dk)

## Supplementary figures

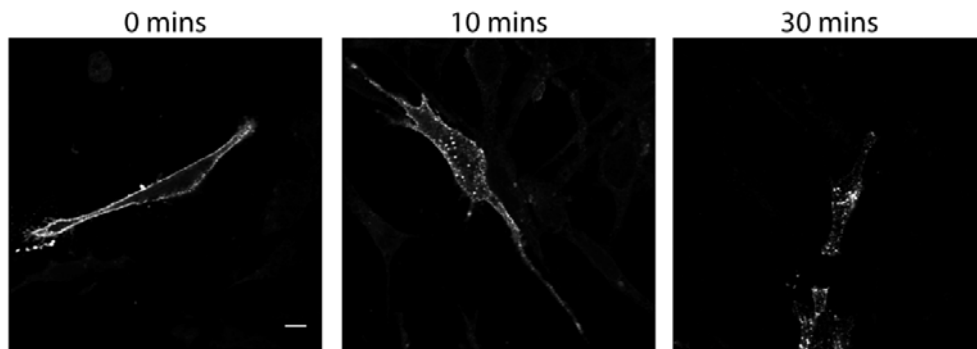

**Figure S1:** 1Rb3An27 cells expressing FLAG-tagged  $\beta_2$ -adrenergic receptor were labeled with M1 antibody at 4 °C followed by incubation with the agonist isoproterenol (10  $\mu$ M) for 0, 10 or 30 minutes. After subsequent fixation and permeabilization, the cells were stained with Alexa568 anti-mouse antibody before mounting and analysis by confocal microscopy. Scale bar 10 $\mu$ m.

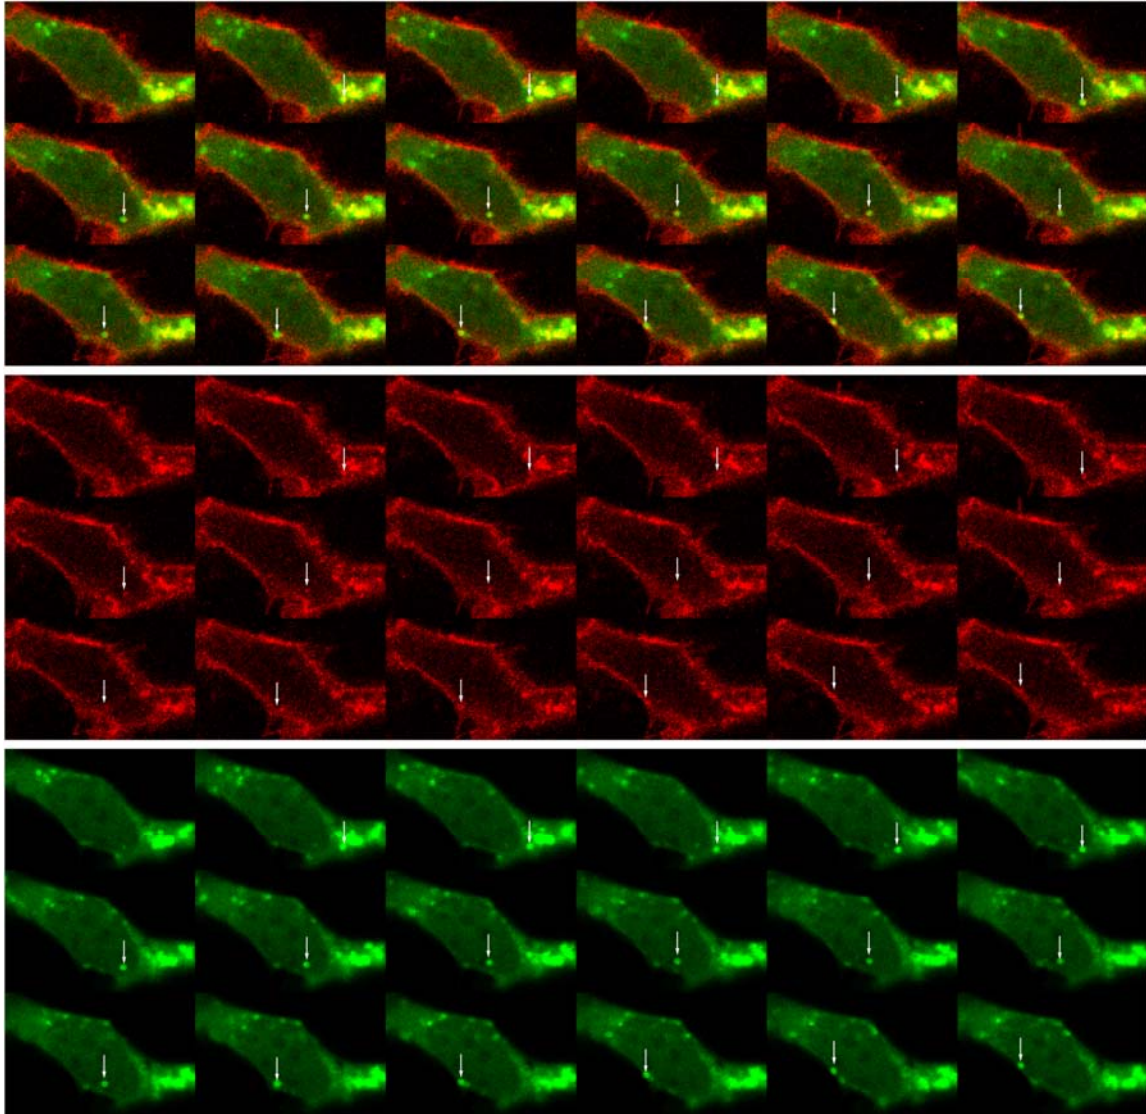

**Figure S2:** 1Rb3An27 cells expressing DAT and EGFP-Rab7 were labeled with JHC 1-64 as described in Experimental Procedures, and DAT was allowed to internalize for 1 hour before confocal live imaging. The imaging was carried out at room temperature and pictures were taken with time intervals of 8 seconds. The arrow indicates a moving vesicle that is positive both for DAT/JHC 1-64 (red channel) and EGFP-Rab7 (green channel).

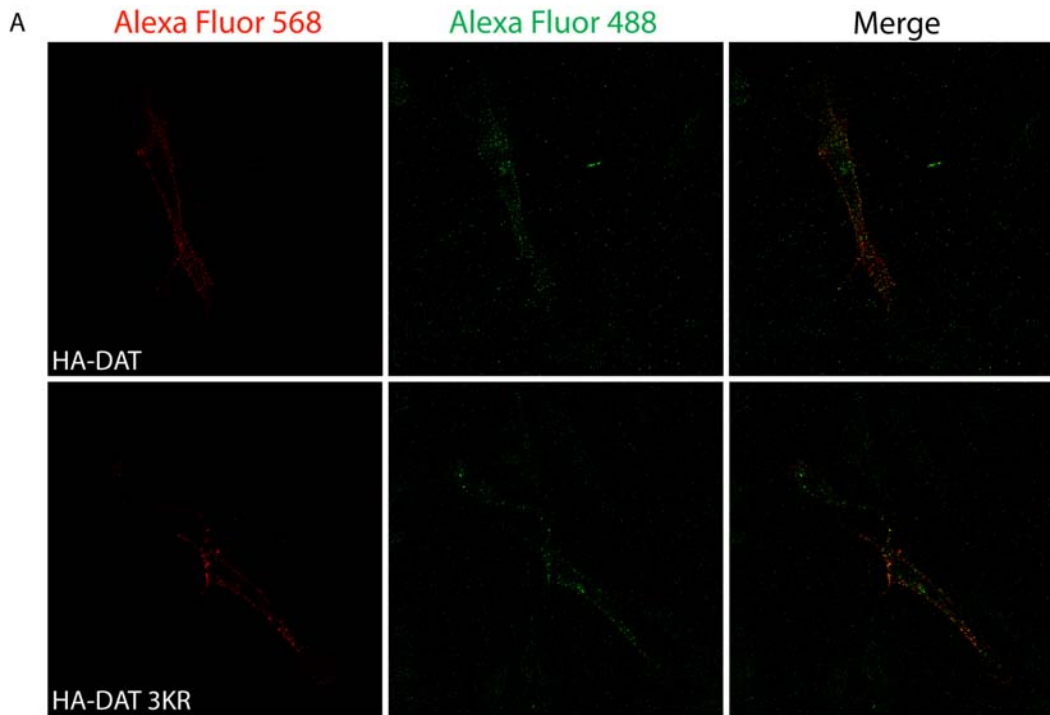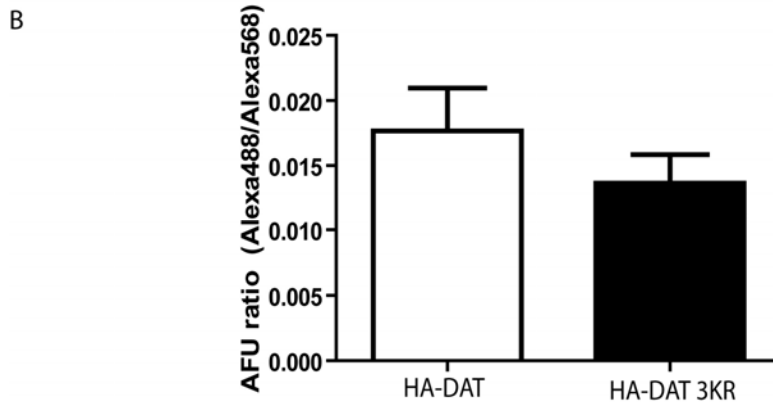

**Figure S3:** HA-DAT 3KR is similar to HA-DAT constitutively internalized in 1Rb3An27 cells.

A, 1Rb3An27 cells were transiently transfected with HA-DAT (upper panels) or HA-DAT 3KR (lower panels). Cells were incubated with HA.11 antibody for 5 minutes at 18-20 °C to label surface transporters and then incubated for 1 hour at 37 °C to allow internalization. After fixation the cells were labelled with Alexa568 anti-mouse antibody to detect surface transporter (left panels), and after permeabilization the cells were labelled with Alexa488 anti-mouse antibody to detect internalized transporter (middle panels). Right panels show overlay of the two channels.

B, Quantification of constitutively internalized HA-DAT or HA-DAT 3KR (Alexa Fluor 488 signal) relative to surface HA-DAT or HA-DAT 3KR (Alexa568 signal) we observed no difference between HA-DAT and HA-DAT 3KR ( $p > 0.05$ , t-test). Bars represent means + S.E. of  $n=18-20$  cells. Similar results were obtained in two independent transfections.

### *Method*

The experiment was done modified from (1). Briefly, 1Rb3An27 cells were transiently transfected with HA-DAT or HA-DAT 3KR two days prior to the experiment. Cells were incubated in HA.11 antibody ( $\frac{1}{2}$ -1  $\mu\text{g/ml}$ ) in DMEM + 10 % FBS for 5 minutes at 18-20 °C, washed 3 times in DMEM + 10 % FBS and incubated in DMEM + 10 % FBS for 1 hour at 37 °C, keeping one of each transfection on ice for 1 hour. Cells were washed in ice cold PBS and blocked in 0.5 % bovine serum albumin in PBS for 30 minutes, then incubated with 5  $\mu\text{g/ml}$  Alexa568-conjugated goat anti-mouse IgG in blocking buffer for 45 minutes and washed 4 times in PBS. Cells were fixed in 4 % paraformaldehyde in PBS for 20 minutes and washed twice in PBS, then permeabilized 5 minutes in 0.2 % Triton X-100 and incubated in 1  $\mu\text{g/ml}$  Alexa488-conjugated goat anti-mouse IgG in blocking buffer. Finally cells were washed 4 times in PBS and mounted with ProLong Gold Antifade. The cells were imaged with a Zeiss LSM 510 confocal laser scanning microscope using a long pass 505 and long pass 560 filters. Z-stacks were obtained with 370 nm intervals to include the entire cell (with amplifier offset set low to threshold unspecific binding\*). Quantification was done with ImageJ software. The cell region of interest was drawn and intensities of fluorescence in the two channels were summed through the Z-stacks, and the Alexa488/Alexa568 ratio taken. The ratio from cells kept at 0 °C was subtracted. 18-20 cells from each condition were analyzed.

1. Sorkina, T., Miranda, M., Dionne, K. R., Hoover, B. R., Zahniser, N. R., and Sorkin, A. (2006) *Journal of Neuroscience* **26**, 8195-8205
